# Supplementary material
Source: PubMed Central journal article supplement (PMC4213280)
Supplement: NIHMS619204-supplement-1.pdf [file NIHMS619204-supplement-1.pdf]

| <b>LEARNER CENTERED</b>                                                                                                                                                                            | <b>1</b> | <b>2</b> | <b>3</b> | <b>4</b> | <b>5</b> |
|----------------------------------------------------------------------------------------------------------------------------------------------------------------------------------------------------|----------|----------|----------|----------|----------|
| 6) Learning climate. ( <i>Safe, open, &amp; encouraging place for learning, asking Q's, elicits motivation/stimulation</i> ).                                                                      |          |          |          |          |          |
| 7) Communication and discussion of goals. ( <i>Clear communication of attending &amp; learner goals, &amp; the expectations, attitudes, knowledge &amp; skills acquired in learning process</i> ). |          |          |          |          |          |
| 8) Enhance understanding. ( <i>Present material in clear/organized way, emphasize key pts, involve learners in process</i> ).                                                                      |          |          |          |          |          |
| 9) Feedback. ( <i>Positive/constructive feedback – inform, reinforce or praise trainees &amp; give constructive criticism when improvement is needed</i> ).                                        |          |          |          |          |          |
| 10) Teamwork. ( <i>Promotes collaborative dynamics betw team – all involved/engaged</i> ).                                                                                                         |          |          |          |          |          |

| <b>GLOBAL RATINGS [Not Reported in this Manuscript]</b>                                       | <b>Toward Patient</b> |          |          |          |          | <b>Toward Team</b> |          |          |          |          |
|-----------------------------------------------------------------------------------------------|-----------------------|----------|----------|----------|----------|--------------------|----------|----------|----------|----------|
|                                                                                               | <b>1</b>              | <b>2</b> | <b>3</b> | <b>4</b> | <b>5</b> | <b>1</b>           | <b>2</b> | <b>3</b> | <b>4</b> | <b>5</b> |
| 11) Responsiveness. ( <i>Reacts to concerns, explores ideas, acknowledges expectations</i> ). |                       |          |          |          |          |                    |          |          |          |          |
| 12) Respectfulness. ( <i>Tone of voice &amp; attitude that shows respect</i> ).               |                       |          |          |          |          |                    |          |          |          |          |
| 13) Listening. ( <i>Facilitates &amp; responds to questions &amp; concerns</i> ).             |                       |          |          |          |          |                    |          |          |          |          |
| 14) Sharing & collaboration. ( <i>Promotes shared decision making &amp; participation</i> ).  |                       |          |          |          |          |                    |          |          |          |          |

**Part C: [unique page repeated for every patient]**

| Patient #: _____                                                             |   |          | Family/friends present? Y N                                                  |   |          | New Pt Admission? Y N DK                                                     |   |          | Pt Discharge? Y N DK |  |  |
|------------------------------------------------------------------------------|---|----------|------------------------------------------------------------------------------|---|----------|------------------------------------------------------------------------------|---|----------|----------------------|--|--|
| Only pt presentation? Y N                                                    |   |          |                                                                              |   |          |                                                                              |   |          |                      |  |  |
| Patient Presentation                                                         | I | Response | Discussion w/ Patient                                                        | I | Response | Review of Case                                                               | I | Response | Notes                |  |  |
| <b>Health Behaviors</b>                                                      |   |          | <b>Health Behaviors</b>                                                      |   |          | <b>Health Behaviors</b>                                                      |   |          |                      |  |  |
| Alcohol                                                                      |   | -1 0 1   | Alcohol                                                                      |   | -1 0 1   | Alcohol                                                                      |   | -1 0 1   |                      |  |  |
| Illicit drugs                                                                |   | -1 0 1   | Illicit drugs                                                                |   | -1 0 1   | Illicit drugs                                                                |   | -1 0 1   |                      |  |  |
| Smoking                                                                      |   | -1 0 1   | Smoking                                                                      |   | -1 0 1   | Smoking                                                                      |   | -1 0 1   |                      |  |  |
| Exercise/Phys Activity                                                       |   | -1 0 1   | Exercise/Phys Activity                                                       |   | -1 0 1   | Exercise/Phys Activity                                                       |   | -1 0 1   |                      |  |  |
| Nutrition/Diet/Obesity                                                       |   | -1 0 1   | Nutrition/Diet/Obesity                                                       |   | -1 0 1   | Nutrition/Diet/Obesity                                                       |   | -1 0 1   |                      |  |  |
| Med Adher/Plan of Care:                                                      |   |          | Med Adher/Plan of Care:                                                      |   |          | Med Adher/Plan of Care:                                                      |   |          |                      |  |  |
| Medications                                                                  |   | -1 0 1   | Medications                                                                  |   | -1 0 1   | Medications                                                                  |   | -1 0 1   |                      |  |  |
| Dx/chronic disease mgmt/plan of care                                         |   | -1 0 1   | Dx/chronic disease mgmt/plan of care                                         |   | -1 0 1   | Dx/chronic disease mgmt/plan of care                                         |   | -1 0 1   |                      |  |  |
| Referral or specialists                                                      |   | -1 0 1   | Referral or specialists                                                      |   | -1 0 1   | Referral or specialists                                                      |   | -1 0 1   |                      |  |  |
| F/u primary care                                                             |   | -1 0 1   | F/u primary care                                                             |   | -1 0 1   | F/u primary care                                                             |   | -1 0 1   |                      |  |  |
| Tests/procedures                                                             |   | -1 0 1   | Tests/procedures                                                             |   | -1 0 1   | Tests/procedures                                                             |   | -1 0 1   |                      |  |  |
| Prevention/screening                                                         |   | -1 0 1   | Prevention/screening                                                         |   | -1 0 1   | Prevention/screening                                                         |   | -1 0 1   |                      |  |  |
| Risky sexual behavior                                                        |   | -1 0 1   | Risky sexual behavior                                                        |   | -1 0 1   | Risky sexual behavior                                                        |   | -1 0 1   |                      |  |  |
| Home/Pt Safety                                                               |   | -1 0 1   | Home/Pt Safety                                                               |   | -1 0 1   | Home/Pt Safety                                                               |   | -1 0 1   |                      |  |  |
| <b>Beh Change Counseling</b>                                                 |   |          | <b>Beh Change Counseling</b>                                                 |   |          | <b>Beh Change Counseling</b>                                                 |   |          |                      |  |  |
| Pt Education                                                                 |   | -1 0 1   | Pt Education                                                                 |   | -1 0 1   | Pt Education                                                                 |   | -1 0 1   |                      |  |  |
| Assess readiness/enhance motivation                                          |   | -1 0 1   | Assess readiness/enhance motivation                                          |   | -1 0 1   | Assess readiness/enhance motivation                                          |   | -1 0 1   |                      |  |  |
| Goal setting                                                                 |   | -1 0 1   | Goal setting                                                                 |   | -1 0 1   | Goal setting                                                                 |   | -1 0 1   |                      |  |  |
| Self-monitoring                                                              |   | -1 0 1   | Self-monitoring                                                              |   | -1 0 1   | Self-monitoring                                                              |   | -1 0 1   |                      |  |  |
| Shared problem solving                                                       |   | -1 0 1   | Shared problem solving                                                       |   | -1 0 1   | Shared problem solving                                                       |   | -1 0 1   |                      |  |  |
|                                                                              |   | -1 0 1   |                                                                              |   | -1 0 1   |                                                                              |   | -1 0 1   |                      |  |  |
| <b>Social/Cultural</b>                                                       |   |          | <b>Social/Cultural</b>                                                       |   |          | <b>Social/Cultural</b>                                                       |   |          |                      |  |  |
| Race/ethnicity/cultural                                                      |   | -1 0 1   | Race/ethnicity/cultural                                                      |   | -1 0 1   | Race/ethnicity/cultural                                                      |   | -1 0 1   |                      |  |  |
| Gender/sex orientation                                                       |   | -1 0 1   | Gender/sex orientation                                                       |   | -1 0 1   | Gender/sex orientation                                                       |   | -1 0 1   |                      |  |  |
| Spirituality/religiosity                                                     |   | -1 0 1   | Spirituality/religiosity                                                     |   | -1 0 1   | Spirituality/religiosity                                                     |   | -1 0 1   |                      |  |  |
| SES (Educ, Occup, \$\$)                                                      |   | -1 0 1   | SES (Educ, Occup, \$\$)                                                      |   | -1 0 1   | SES (Educ, Occup, \$\$)                                                      |   | -1 0 1   |                      |  |  |
| Language                                                                     |   | -1 0 1   | Language                                                                     |   | -1 0 1   | Language                                                                     |   | -1 0 1   |                      |  |  |
| Literacy/health literacy                                                     |   | -1 0 1   | Literacy/health literacy                                                     |   | -1 0 1   | Literacy/health literacy                                                     |   | -1 0 1   |                      |  |  |
| Social supports                                                              |   | -1 0 1   | Social supports                                                              |   | -1 0 1   | Social supports                                                              |   | -1 0 1   |                      |  |  |
| Resources (financial, housing, insurance, healthcare access, transportation) |   | -1 0 1   | Resources (financial, housing, insurance, healthcare access, transportation) |   | -1 0 1   | Resources (financial, housing, insurance, healthcare access, transportation) |   | -1 0 1   |                      |  |  |

|                                                      |  |    |   |   |                                                      |  |    |   |   |
|------------------------------------------------------|--|----|---|---|------------------------------------------------------|--|----|---|---|
| <b><i>Mind-Body</i></b>                              |  |    |   |   |                                                      |  |    |   |   |
| CAM/Integr Med                                       |  | -1 | 0 | 1 | CAM/Integr Med                                       |  | -1 | 0 | 1 |
| Stress (specify)                                     |  | -1 | 0 | 1 | Stress (specify)                                     |  | -1 | 0 | 1 |
| Psych (comorbid)                                     |  | -1 | 0 | 1 | Psych                                                |  | -1 | 0 | 1 |
| Pain (history, pain meds, level of pain & pain mgmt) |  | -1 | 0 | 1 | Pain (history, pain meds, level of pain & pain mgmt) |  | -1 | 0 | 1 |
|                                                      |  | -1 | 0 | 1 |                                                      |  | -1 | 0 | 1 |

| <b>Teaching Opportunities</b>                                                                |                                                                                                                                                                                       |
|----------------------------------------------------------------------------------------------|---------------------------------------------------------------------------------------------------------------------------------------------------------------------------------------|
| <b>Best Practices</b> (intended to capture best practices for teaching and/or clinical care) | <b>Possible Missed Teachable Moments</b> (intended to highly missed opportunities around social and behavioral topics that emerged in the process of clinical care/clinical teaching) |
|                                                                                              |                                                                                                                                                                                       |

| <b>Other Comments (Special contextual factors, patient variables, influences on team, general observations, etc.)</b> |
|-----------------------------------------------------------------------------------------------------------------------|
|                                                                                                                       |
